# Supplementary material
Source: PubMed Central journal article supplement (PMC3626807)
Supplement: supp_121490_hormone-racine-1-at.pdf [file supp_121490_hormone-racine-1-at.pdf]

### Appendix 1: Validation study (n = 250)\*

| Self-reported gallstone disease                                 | No. of women who supplied requested documents | Concordance between self-report and document, no. (%) of women |
|-----------------------------------------------------------------|-----------------------------------------------|----------------------------------------------------------------|
| Cholecystectomy (n = 100)                                       | 84                                            | 83 (99)                                                        |
| Untreated gallstone disease (n = 100)                           | 84                                            | 57 (67)                                                        |
| No declaration of cholecystectomy or gallstone disease (n = 50) | 46                                            | 46 (92)                                                        |

\*The 250 women were sent a detailed questionnaire that requested documents relative to diagnostic and surgical procedures.
